# Supplementary material
Source: ML conference proceedings conference paper supplement (https://openaccess.thecvf.com/content/CVPR2021/html/Lee_Railroad_Is_Not_CVPR_2021_paper.html)
Supplement: Supplementary file 1 [file Lee_Railroad_Is_Not_CVPR_2021_supplemental.zip]

Archive with 2 entries (2 files):
- 04107-supp.pdf
- 04107-video.mp4
